# Supplementary material for: Early Negativization of SARS-CoV-2 Infection by Nasal Spray of Seawater plus Additives: The RENAISSANCE Open-Label Controlled Clinical Trial
Source: MDPI journal article supplement (doi:10.3390/pharmaceutics14112502), 2022-11-18
Supplement: s1 [file s1]

### Supplementary File (S1). COVID-19 QUESTIONNAIRE

| SECTION 1: PERSONAL INFORMATION                                                                                  |                                       |
|------------------------------------------------------------------------------------------------------------------|---------------------------------------|
| Date of birth                                                                                                    |                                       |
| Date of first nasal positive swab test for SARS-CoV-2                                                            |                                       |
| Date of first nasal negative swab test for SARS-CoV-2                                                            |                                       |
| Why were you tested for COVID-19 ?                                                                               | COVID 19 related symptoms             |
|                                                                                                                  | close contact with a positive subject |
|                                                                                                                  | Both                                  |
| Did you have COVID-19 before?                                                                                    | No                                    |
|                                                                                                                  | Yes                                   |
| If you answered yes before, when did it happens and how many times?                                              |                                       |
| How many COVID-19 vaccine doses did you received?<br>(please specify also date of vaccinations and vaccine type) | 1                                     |
|                                                                                                                  | 2                                     |
|                                                                                                                  | 3                                     |
|                                                                                                                  | None                                  |
| SECTION 2: COMORBIDITIES, VACCINATION STATUS AND DENTAL HYGIENE                                                  |                                       |
| Sex                                                                                                              | Female                                |
|                                                                                                                  | Male                                  |
| Smoking                                                                                                          | Never smoker                          |
|                                                                                                                  | Ex smoker                             |
|                                                                                                                  | Current smoker                        |
| Alcohol consumption                                                                                              | No                                    |
|                                                                                                                  | Occasionally                          |
|                                                                                                                  | Yes                                   |

|                                                                                     |                           |
|-------------------------------------------------------------------------------------|---------------------------|
| Do you have high blood pressure?                                                    | No                        |
|                                                                                     | Yes                       |
|                                                                                     | I take medications for it |
| Do you suffer from diabetes?                                                        | No                        |
|                                                                                     | Yes                       |
| Do/Did you suffer from cardiovascular disorders<br>(including heart rate disorders) | No                        |
|                                                                                     | Yes                       |
| Do/Did you suffer from cerebrovascular<br>disorders (stroke, TIA, other)?           | No                        |
|                                                                                     | Yes                       |
| Do/did you have cancer?                                                             | No                        |
|                                                                                     | Yes                       |
| Do you suffer from chronic obstructive pulmonary disease<br>(COPD)?                 | No                        |
|                                                                                     | Yes                       |
| Are you in renal failure?                                                           | No                        |
|                                                                                     | Yes                       |
| Do you suffer of liver failure?                                                     | No                        |
|                                                                                     | Yes                       |
| Do you brush your teeth?                                                            | No                        |
|                                                                                     | Yes                       |
| How many time do you brush your teeth every day?                                    |                           |
| <b>SECTION 3: COVID-19 SYMPTOMS</b>                                                 |                           |
| Do you have now dry cough?                                                          | No                        |
|                                                                                     | Yes, to some extent       |
|                                                                                     | Yes, a lot                |

|                                                    |                     |
|----------------------------------------------------|---------------------|
| Do you have now productive cough?                  | No                  |
|                                                    | Yes, to some extent |
|                                                    | Yes, a lot          |
| Do you have now a sensation of a blocked ears?     | No                  |
|                                                    | Yes, to some extent |
|                                                    | Yes, a lot          |
| Do you have now a sensation of stuffy nose?        | No                  |
|                                                    | Yes, to some extent |
|                                                    | Yes, a lot          |
| Do you have now a sensation of running nose?       | No                  |
|                                                    | Yes, to some extent |
|                                                    | Yes, a lot          |
| Do you sneeze now frequently?                      | No                  |
|                                                    | Yes, to some extent |
|                                                    | Yes, a lot          |
| Do you now have now lacrimation?                   | No                  |
|                                                    | Yes, to some extent |
|                                                    | Yes, a lot          |
| Do you have now hoarseness or lump in your throat? | No                  |
|                                                    | Yes, to some extent |
|                                                    | Yes, a lot          |
| Do you have now fever?                             | No                  |
|                                                    | Yes, to some extent |
|                                                    | Yes, a lot          |

|                                    |                     |
|------------------------------------|---------------------|
| Do you now sweat?                  | No                  |
|                                    | Yes, to some extent |
|                                    | Yes, a lot          |
| Do you feel now chilly?            | No                  |
|                                    | Yes, to some extent |
|                                    | Yes, a lot          |
| Do you feel now headache?          | No                  |
|                                    | Yes, to some extent |
|                                    | Yes, a lot          |
| Do you have now throat discomfort? | No                  |
|                                    | Yes, to some extent |
|                                    | Yes, a lot          |
| Do you have sore throat?           | No                  |
|                                    | Yes, to some extent |
|                                    | Yes, a lot          |
| Do you have muscle ache?           | No                  |
|                                    | Yes, to some extent |
|                                    | Yes, a lot          |
| Do you feel joint pain?            | No                  |
|                                    | Yes, to some extent |
|                                    | Yes, a lot          |
| Do you feel thoracic pain?         | No                  |
|                                    | Yes, to some extent |
|                                    | Yes, a lot          |

|                                                                                                    |                     |
|----------------------------------------------------------------------------------------------------|---------------------|
| Do you have sinusitis pain (a sensation of blocked nose, pressure on your face, frontal headache)? | No                  |
|                                                                                                    | Yes, to some extent |
|                                                                                                    | Yes, a lot          |
| Do you have neck swelling?                                                                         | No                  |
|                                                                                                    | Yes, to some extent |
|                                                                                                    | Yes, a lot          |
| Have you lost your appetite?                                                                       | No                  |
|                                                                                                    | Yes, to some extent |
|                                                                                                    | Yes, a lot          |
| Do you have respiratory problems?                                                                  | No                  |
|                                                                                                    | Yes, to some extent |
|                                                                                                    | Yes, a lot          |
| Do you have now dyspnea?                                                                           | No                  |
|                                                                                                    | Yes, to some extent |
|                                                                                                    | Yes, a lot          |
| Do you feel shortness of breath when you walk?                                                     | No                  |
|                                                                                                    | Yes, to some extent |
|                                                                                                    | Yes, a lot          |
| Can you think straight?                                                                            | No                  |
|                                                                                                    | Yes, to some extent |
|                                                                                                    | Yes, a lot          |
| Do you have difficulties with your daily routine?                                                  | No                  |
|                                                                                                    | Yes, to some extent |
|                                                                                                    | Yes, a lot          |

|                                               |                     |
|-----------------------------------------------|---------------------|
| Do you feel lazy?                             | No                  |
|                                               | Yes, to some extent |
|                                               | Yes, a lot          |
| Do you feel tired?                            | No                  |
|                                               | Yes, to some extent |
|                                               | Yes, a lot          |
| Do you feel different?                        | No                  |
|                                               | Yes, to some extent |
|                                               | Yes, a lot          |
| Do you feel so bad that you must stay in bed? | No                  |
|                                               | Yes, to some extent |
|                                               | Yes, a lot          |
| Do you have poor sleep quality?               | No                  |
|                                               | Yes, to some extent |
|                                               | Yes, a lot          |
| Do you wake up often at night?                | No                  |
|                                               | Yes, to some extent |
|                                               | Yes, a lot          |
| Do you find it difficult to fall asleep?      | No                  |
|                                               | Yes, to some extent |
|                                               | Yes, a lot          |
| Are you awake most of the night?              | No                  |
|                                               | Yes, to some extent |
|                                               | Yes, a lot          |
| Do you feeling moody?                         | No                  |
|                                               | Yes, to some extent |
|                                               | Yes, a lot          |

|                                                                                               |                     |
|-----------------------------------------------------------------------------------------------|---------------------|
| Do you feel irritable?                                                                        | No                  |
|                                                                                               | Yes, to some extent |
|                                                                                               | Yes, a lot          |
| Are you taking antipiretic medications?                                                       | No                  |
|                                                                                               | Yes, to some extent |
|                                                                                               | Yes, a lot          |
| Are you taking painkillers?                                                                   | No                  |
|                                                                                               | Yes, to some extent |
|                                                                                               | Yes, a lot          |
| Are you taking antibiotics?                                                                   | No                  |
|                                                                                               | Yes, to some extent |
|                                                                                               | Yes, a lot          |
| Are you taking you take spray or inhalers for asthma or chronic obstructive bronchopneumonia? | No                  |
|                                                                                               | Yes, to some extent |
|                                                                                               | Yes, a lot          |
| Are you taking tablets for asthma or chronic obstructive bronchopneumonia?                    | No                  |
|                                                                                               | Yes, to some extent |
|                                                                                               | Yes, a lot          |
| Are you taking you take anti-tussive medications?                                             | No                  |
|                                                                                               | Yes, to some extent |
|                                                                                               | Yes, a lot          |
| Are you taking you taking eye drops?                                                          | No                  |
|                                                                                               | Yes, to some extent |
|                                                                                               | Yes, a lot          |

|                                                                               |                     |
|-------------------------------------------------------------------------------|---------------------|
| Are you taking you take nasal spray?                                          | No                  |
|                                                                               | Yes, to some extent |
|                                                                               | Yes, a lot          |
| Do/Did you have diarrhoea?                                                    | No                  |
|                                                                               | Yes, to some extent |
|                                                                               | Yes, a lot          |
| Do you feel nausea?                                                           | No                  |
|                                                                               | Yes, to some extent |
|                                                                               | Yes, a lot          |
| Do/did you have vomit?                                                        | No                  |
|                                                                               | Yes, to some extent |
|                                                                               | Yes, a lot          |
| Do you feel stomach-ache?                                                     | No                  |
|                                                                               | Yes, to some extent |
|                                                                               | Yes, a lot          |
| Do you feel dizzy?                                                            | No                  |
|                                                                               | To some extent      |
|                                                                               | Yes, a lot          |
| Do you feel anosmia/ageusia<br>(reduced/altered sense of taste and/or smell)? | No                  |
|                                                                               | Yes, marginally     |
|                                                                               | Yes, to some extent |
|                                                                               | Yes, moderate       |
|                                                                               | Yes, a lot          |
|                                                                               | Yes, completely     |
| Do you have any other symptoms that we haven't asked for?<br>(please specify) |                     |
